# Supplementary material for: Type IV Collagen Variants in CKD: Performance of Computational Predictions for Identifying Pathogenic Variants
Source: PubMed Central journal article supplement (PMC8039416; doi:10.1016/j.xkme.2020.12.007), 2021-02-10
Supplement: mmc1.pdf [file mmc1.pdf]

**Table S1.** Twelve *In Silico* Predictions Programs Used.

| Program        | Method                           | Training Database                                                                                                                                                                                                            | Testing Database                                   | Information used for model                                                                                                                                                                                                                                                                                                                                                                                                                                                                                                                                                                                                                                                                                                                                                                                                           |
|----------------|----------------------------------|------------------------------------------------------------------------------------------------------------------------------------------------------------------------------------------------------------------------------|----------------------------------------------------|--------------------------------------------------------------------------------------------------------------------------------------------------------------------------------------------------------------------------------------------------------------------------------------------------------------------------------------------------------------------------------------------------------------------------------------------------------------------------------------------------------------------------------------------------------------------------------------------------------------------------------------------------------------------------------------------------------------------------------------------------------------------------------------------------------------------------------------|
| SIFT           | Position-specific scoring matrix | E. Coli LacI gene                                                                                                                                                                                                            | HIV-1 protease and bacteriophage T4 lysozyme genes | Sequence homology<br><a href="https://www.ncbi.nlm.nih.gov/pmc/articles/PMC311071/">https://www.ncbi.nlm.nih.gov/pmc/articles/PMC311071/</a>                                                                                                                                                                                                                                                                                                                                                                                                                                                                                                                                                                                                                                                                                         |
| PolyPhen2-HDIV | Naïve Bayes Classifier           | UniProt<br><br>HumDiv is Mendelian disease variants vs. divergence from close mammalian homologs of human proteins ( $\geq 95\%$ sequence identity).                                                                         | UniProt                                            | 8 Sequence-based features<br><ul style="list-style-type: none"> <li>- PSIC score</li> <li>- Sequence identity</li> <li>- CgG context</li> <li>- Congruency to MSA</li> <li>- Probability of substitution based on congruency</li> <li>- Alignment depth</li> <li>- Change in amino acid volume</li> <li>- Location in Pfam domain</li> </ul> 3 Structure-based features<br><ul style="list-style-type: none"> <li>- Accessible surface area of wild-type amino acid residue</li> <li>- Change in hydrophobic propensity</li> <li>- Conformational mobility</li> </ul> <a href="https://www.ncbi.nlm.nih.gov/pmc/articles/PMC2855889/#SD1">https://www.ncbi.nlm.nih.gov/pmc/articles/PMC2855889/#SD1</a><br><a href="https://www.ncbi.nlm.nih.gov/pmc/articles/PMC4480630/">https://www.ncbi.nlm.nih.gov/pmc/articles/PMC4480630/</a> |
| PolyPhen2-HVAR | Naïve Bayes Classifier           | UniProt; HumVar is all human variants associated with some disease (except cancer mutations) or loss of activity/function vs. common (MAF>1%) human polymorphism with no reported association with a disease of other effect | UniProt                                            | Same as above                                                                                                                                                                                                                                                                                                                                                                                                                                                                                                                                                                                                                                                                                                                                                                                                                        |

| Program          | Method                             | Training Database     | Testing Database                                                            | Information used for model                                                                                                                                                                                                                                                                                                                                                                                                                                                                                                                                                                                                     |
|------------------|------------------------------------|-----------------------|-----------------------------------------------------------------------------|--------------------------------------------------------------------------------------------------------------------------------------------------------------------------------------------------------------------------------------------------------------------------------------------------------------------------------------------------------------------------------------------------------------------------------------------------------------------------------------------------------------------------------------------------------------------------------------------------------------------------------|
| FATHMM           | Hidden Markov models               | HGMD + UniProt        | VariBench + literature + SwissVar portal                                    | Sequence homology + relative frequency of disease-associated and functionally neutral amino acid substitutions<br><br><a href="https://www.ncbi.nlm.nih.gov/pmc/articles/PMC3558800/">https://www.ncbi.nlm.nih.gov/pmc/articles/PMC3558800/</a>                                                                                                                                                                                                                                                                                                                                                                                |
| FATHMM-MKL       | Multiple kernel learning           | HGMD + 1000G          | HGMD + 1000G + ClinVar                                                      | 10 feature groups: <ul style="list-style-type: none"> <li>- 46-Way Sequence Conservation</li> <li>- Histone Modifications (ChIP-Seq)</li> <li>- Transcription Factor Binding Sites (TFBS PeakSeq)</li> <li>- Open Chromatin (DNase-Seq)</li> <li>- 100-Way Sequence Conservation</li> <li>- GC Content</li> <li>- Open Chromatin (FAIRE)</li> <li>- Transcription Factor Binding Sites (TFBS SPP)</li> <li>- Genome Segmentation</li> <li>- ENCODE annotations</li> </ul><br><a href="https://academic.oup.com/bioinformatics/article/31/10/1536/177080">https://academic.oup.com/bioinformatics/article/31/10/1536/177080</a> |
| MutationAssessor | Combinatorial entropy optimization | COSMIC                | COSMIC                                                                      | Sequence homology + specificity residues between subfamilies<br><br><a href="http://mutationassessor.org/r3/MutationAssessor_white_paper.pdf">http://mutationassessor.org/r3/MutationAssessor_white_paper.pdf</a>                                                                                                                                                                                                                                                                                                                                                                                                              |
| PROVEAN          | Alignment score                    | UniProt/HUMSAVAR      | UniProt + Swiss-Prot + TP53 genes + ABCA1 genes                             | Sequence homology<br><br><a href="https://journals.plos.org/plosone/article?id=10.1371/journal.pone.0046688">https://journals.plos.org/plosone/article?id=10.1371/journal.pone.0046688</a>                                                                                                                                                                                                                                                                                                                                                                                                                                     |
| MutationTaster   | Bayes classifier                   | HGMD + 1000G          | HGMD + 1000G + ClinVar                                                      | Conservation, splice site, mRNA features, protein features, allele frequencies from HGMD and 1000G<br><br><a href="http://www.mutationtaster.org/info/documentation.html">http://www.mutationtaster.org/info/documentation.html</a>                                                                                                                                                                                                                                                                                                                                                                                            |
| LRT              | Likelihood ratio test              | 32 vertebrate genomes | OMIM database + literature + 3 genomes (Venter, Watson, and Chinese genome) | Sequence homology<br><br><a href="https://www.ncbi.nlm.nih.gov/pmc/articles/PMC2752137/">https://www.ncbi.nlm.nih.gov/pmc/articles/PMC2752137/</a>                                                                                                                                                                                                                                                                                                                                                                                                                                                                             |

| Program | Method                            | Training Database            | Testing Database                | Information used for model                                                                                                                                                                                                                                                                                                                                                                                                                                                                                                                                               |
|---------|-----------------------------------|------------------------------|---------------------------------|--------------------------------------------------------------------------------------------------------------------------------------------------------------------------------------------------------------------------------------------------------------------------------------------------------------------------------------------------------------------------------------------------------------------------------------------------------------------------------------------------------------------------------------------------------------------------|
| M-CAP   | Gradient boosting tree classifier | Rare variants in HGMD + ExAC | Rare variants in HGMD + ExAC    | <p>9 pathogenicity likelihood scores</p> <ul style="list-style-type: none"> <li>- SIFT</li> <li>- PolyPhen2</li> <li>- CADD</li> <li>- MutationTaster</li> <li>- MutationAssessor</li> <li>- FATHMM</li> <li>- LRT</li> <li>- MetaLR</li> <li>- MetaSVM</li> </ul> <p>7 measures of genetic conservation</p> <ul style="list-style-type: none"> <li>- RVIS</li> <li>- PhyloP</li> <li>- PhastCons</li> <li>- PAM250</li> <li>- BLOSUM62</li> <li>- SIPHY</li> <li>- GERP</li> </ul> <p>298 new features derived from primate, mammalian, and vertebrate genomes MSA*</p> |
| MetaLR  | Logistic regression               | UniProt                      | Literature + CHARGE + VariBench | <p>Nine prediction scores</p> <ul style="list-style-type: none"> <li>- PolyPhen-2</li> <li>- SIFT</li> <li>- MutationTaster</li> <li>- Mutation Assessor</li> <li>- FATHMM</li> <li>- LRT</li> <li>- GERP++</li> <li>- SiPhy</li> <li>- PhyloP</li> </ul> <p>Allele frequencies in 1000G<br/> <a href="https://www.ncbi.nlm.nih.gov/pmc/articles/PMC4375422/">https://www.ncbi.nlm.nih.gov/pmc/articles/PMC4375422/</a></p>                                                                                                                                              |
| MetaSVM | Support vector machine            | UniProt                      | Literature + CHARGE + VariBench | <p>Same as above<br/> <a href="https://www.ncbi.nlm.nih.gov/pmc/articles/PMC4375422/">https://www.ncbi.nlm.nih.gov/pmc/articles/PMC4375422/</a></p>                                                                                                                                                                                                                                                                                                                                                                                                                      |

\*[https://www.nature.com/articles/ng.3703.epdf?author\\_access\\_token=QpYcDWHWC2sC08xquy51RtRgN0jAjWel9jnR3ZoTv0NW\\_LUqRr20bAF4DHicakv7aAze4axhulp3iw7\\_FiWtLJK80EJeraUYDseDG607CfszMjiK1pq2G7wodelPyGeQ](https://www.nature.com/articles/ng.3703.epdf?author_access_token=QpYcDWHWC2sC08xquy51RtRgN0jAjWel9jnR3ZoTv0NW_LUqRr20bAF4DHicakv7aAze4axhulp3iw7_FiWtLJK80EJeraUYDseDG607CfszMjiK1pq2G7wodelPyGeQ)

Programs and Access dates

SIFT (February 3, 2015 ensembl 66 version)<sup>1</sup>, PolyPhen2-HDIV (April 11, 2012 version)<sup>2, 3</sup>, Polyphen2- HVAR (April 11, 2012 version)<sup>2, 3</sup>, FATHMM (August 13, 2015 version)<sup>4</sup>, FATHMM-MKL (August 3, 2015 version)<sup>5</sup>, MutationAssessor (March 20, 2016 release 3)<sup>6, 7</sup>, MutationTaster (March 20, 2016 ensemble 69 version)<sup>8</sup>, PROVEAN (February 3, 2015 score v1.1)<sup>9, 10</sup>, LRT (October 3, 2013 version)<sup>11</sup>, M-CAP (November 30, 2016 version)<sup>12</sup>, MetaLR (January 26, 2014 version)<sup>13</sup>, and MetaSVM January 26, 2014 version)<sup>14</sup>.

**Table S2.** Clinical Characteristics of FSGS Patients with *COL4A3* Variants.

| ID                                                | Variant      | Any Other Variant?      | Sex | Age of Onset | Peak proteinuria (g) | Hematuria             | Nadir serum albumin (g/L) | Treatment                               | Treatment Response | ESRD | GBM comments in biopsy report |
|---------------------------------------------------|--------------|-------------------------|-----|--------------|----------------------|-----------------------|---------------------------|-----------------------------------------|--------------------|------|-------------------------------|
| <i>COL4A3</i> : Pathogenic                        |              |                         |     |              |                      |                       |                           |                                         |                    |      |                               |
| 6062                                              | G407R (het)  | No                      | F   | 30           | 4                    | No                    | unk                       | 16 weeks of prednisone                  | Resistant          | unk  | Diffusely thin                |
| 7215                                              | G818R (het)  | No                      | F   | 13           | unk                  | No                    | unk                       | prednisone, tacrolimus and MMF          | Resistant          | No   | Abnormal                      |
| 2555                                              | G1219C (het) | No                      | F   | 36           | 4.8                  | Microscopic hematuria | 40                        | 62 weeks of prednisone and azathioprine | Resistant          | yes  | Normal                        |
| <i>COL4A3</i> : Variant of Uncertain Significance |              |                         |     |              |                      |                       |                           |                                         |                    |      |                               |
| 6085                                              | K78Q (het)   | No                      | F   | unk          | unk                  | No                    | unk                       | unk                                     | unk                | unk  | Normal                        |
| 2564                                              | G94A (het)   | No                      | F   | 22           | unk                  | No                    | unk                       | Steroids                                | Unknown response   | No   | Normal                        |
| 7901<br>Page 4 of 10                              | E286G (het)  | No                      | M   | 5            | 2.1                  | No                    | 39                        | Steroids                                | Partial response   | No   | Normal                        |
| 2378                                              | G1595R (het) | <i>INF2</i> R106P (het) | M   | 22           | 8.2                  | Microscopic hematuria | 33                        | 8 weeks of cyclosporine treatment       | Resistant          | yes  | unk                           |

**Table S3.** Clinical Characteristics of FSGS Patients with *COL4A5* Variants.

| ID                                                | Variant      | Any Other Variant? | Sex | Age of onset | Peak proteinuria (g) | Hematuria             | Nadir serum albumin (g/L) | Treatment                   | Treatment Response | ESRD | GBM comments in biopsy report |
|---------------------------------------------------|--------------|--------------------|-----|--------------|----------------------|-----------------------|---------------------------|-----------------------------|--------------------|------|-------------------------------|
| <i>COL4A5</i> : Pathogenic                        |              |                    |     |              |                      |                       |                           |                             |                    |      |                               |
| 2594                                              | G426R (het)  | No                 | F   | 28           | unk                  | Microscopic hematuria | 35                        | Cyclosporine                | Resistant          | Yes  | unk                           |
| 4976                                              | G594D (het)  | No                 | M   | 41           | 7.58                 | No                    | 42                        | Steroid                     | Resistant          | No   | Focally thin                  |
| 6223                                              | G869R (het)  | No                 | F   | unk          | unk                  | No                    | unk                       | unk                         | Unknown response   | Yes  | unk                           |
| 2480                                              | G935D (het)  | No                 | F   | unk          | unk                  | No                    | unk                       | Prednisone                  | Resistant          | Yes  | unk                           |
| 1590                                              | G1006V (het) | No                 | F   | 28           | 4.12                 | Microscopic hematuria | 27                        | unk                         | Unknown response   | No   | unk                           |
| 5269                                              | G1170S (het) | No                 | M   | 57           | 7.19                 | Microscopic hematuria | 26                        | Steroid and cyclosporine    | Partial response   | Yes  | Irregular and focally thin    |
| <i>COL4A5</i> : Variant of Uncertain Significance |              |                    |     |              |                      |                       |                           |                             |                    |      |                               |
| 2555                                              | P589Q (het)  | No                 | F   | 36           | 4.8                  | Microscopic hematuria | 40                        | Prednisone and azathioprine | Resistant          | Yes  | Normal                        |
| 2738                                              | G752V (het)  | No                 | M   | 49           | 2.38                 | No                    | 41                        | None                        | U/A                | No   | No EM                         |

|      |                 |    |   |    |       |    |    |                                                      |                     |     |        |
|------|-----------------|----|---|----|-------|----|----|------------------------------------------------------|---------------------|-----|--------|
| 2690 | P1221T<br>(het) | No | M | 56 | 11.15 | No | 36 | unk                                                  | unk                 | Yes | Normal |
| 7941 | P1551H<br>(het) | No | M | 47 | 15    | No | 31 | Prednisone<br>and different<br>immunosuppr<br>essant | Partial<br>response | No  | Normal |

ESRD = end-stage renal disease, GBM = glomerular basement membrane, unk = unknown, het=heterozygous  
 Family history only in 7215 reported but no other relatives available to test for segregation studies.

|                    | Rs13424243 |   |        |        | Rs10178458 |        |        |          |        | Rs6436669 |          |        |        | Rs55703767 |        |        |          |        | Rs11677877 |  |  |  |  |  | Rs28381984 |  |  |              |                     |
|--------------------|------------|---|--------|--------|------------|--------|--------|----------|--------|-----------|----------|--------|--------|------------|--------|--------|----------|--------|------------|--|--|--|--|--|------------|--|--|--------------|---------------------|
|                    | G43R       |   |        |        | L141P      |        |        |          |        | E162G     |          |        |        | D326Y      |        |        |          |        | H451R      |  |  |  |  |  | P574L      |  |  |              |                     |
| exon #             | 2          |   |        |        | 7          |        |        |          |        | 9         |          |        |        | 17         |        |        |          |        | 22         |  |  |  |  |  | 25         |  |  |              |                     |
| ref AA             | ...FCD     | G | AKG... | ...PGT | L          | GYP... | ...PAK | E        | EDI... | ...MGE    | D        | GIK... | ...PGD | H          | GLP... | ...PGT | P        | GVK... |            |  |  |  |  |  |            |  |  |              |                     |
| alt AA             | R          |   |        |        | P          |        |        | G        |        |           | Y        |        |        | R          |        |        | L        |        |            |  |  |  |  |  |            |  |  |              |                     |
| ancestral allele   | G          |   |        |        | T          |        |        | G        |        |           | G        |        |        | G          |        |        | C        |        |            |  |  |  |  |  | C          |  |  |              |                     |
| contig allele      | <u>G</u>   |   |        |        | <u>T</u>   |        |        | <u>A</u> |        |           | <u>G</u> |        |        | <u>A</u>   |        |        | <u>C</u> |        |            |  |  |  |  |  | <u>C</u>   |  |  |              |                     |
| major allele       | G          |   |        |        | C          |        |        | G        |        |           | G        |        |        | A          |        |        | C        |        |            |  |  |  |  |  | C          |  |  |              |                     |
| minor allele       | C          |   |        |        | T          |        |        | A        |        |           | T        |        |        | G          |        |        | T        |        |            |  |  |  |  |  | T          |  |  |              |                     |
| MAF                | 0.354      |   |        |        | 0.16       |        |        | 0.161    |        |           | 0.212    |        |        | 0.069      |        |        | 0.473    |        |            |  |  |  |  |  |            |  |  |              |                     |
| 1KG EUR haplotypes |            |   |        |        |            |        |        |          |        |           |          |        |        |            |        |        |          |        |            |  |  |  |  |  |            |  |  |              | haplotype frequency |
| H1                 | G          |   |        |        | C          |        |        | G        |        |           | G        |        |        | A          |        |        | T        |        |            |  |  |  |  |  | T          |  |  | 0.233        |                     |
| H2                 | G          |   |        |        | C          |        |        | G        |        |           | G        |        |        | A          |        |        | C        |        |            |  |  |  |  |  | C          |  |  | 0.16         |                     |
| H3                 | C          |   |        |        | C          |        |        | G        |        |           | G        |        |        | A          |        |        | T        |        |            |  |  |  |  |  | T          |  |  | 0.154        |                     |
| H4                 | C          |   |        |        | C          |        |        | G        |        |           | T        |        |        | A          |        |        | C        |        |            |  |  |  |  |  | C          |  |  | 0.096        |                     |
| H5                 | G          |   |        |        | C          |        |        | G        |        |           | T        |        |        | A          |        |        | C        |        |            |  |  |  |  |  | C          |  |  | 0.093        |                     |
| H6                 | G          |   |        |        | T          |        |        | A        |        |           | G        |        |        | A          |        |        | T        |        |            |  |  |  |  |  | T          |  |  | 0.066        |                     |
| H7                 | C          |   |        |        | C          |        |        | G        |        |           | G        |        |        | G          |        |        | C        |        |            |  |  |  |  |  | C          |  |  | 0.038        |                     |
| H8                 | G          |   |        |        | C          |        |        | G        |        |           | G        |        |        | G          |        |        | C        |        |            |  |  |  |  |  | C          |  |  | 0.037        |                     |
| H9                 | <u>G</u>   |   |        |        | <u>T</u>   |        |        | <u>A</u> |        |           | <u>G</u> |        |        | <u>A</u>   |        |        | <u>C</u> |        |            |  |  |  |  |  | <u>C</u>   |  |  | <u>0.037</u> |                     |
| ...                |            |   |        |        |            |        |        |          |        |           |          |        |        |            |        |        |          |        |            |  |  |  |  |  |            |  |  |              |                     |

**Supplementary Table 4.** Common *COL4A3* Haplotypes Identified in Europeans in the 1000 Genomes Project

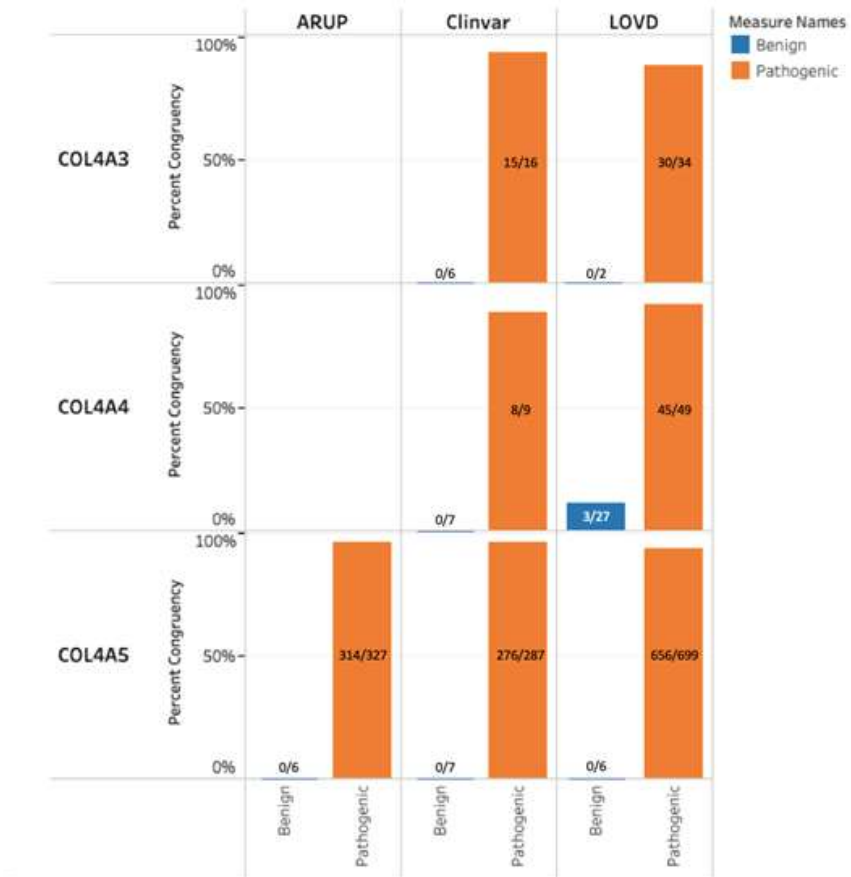

**Supplementary Figure 1.** Comparison of *COL4A3*, *COL4A4* and *COL4A5* *in silico* predictions by M-CAP with disease database categorization. Shown are the total number of variants tested in each database.



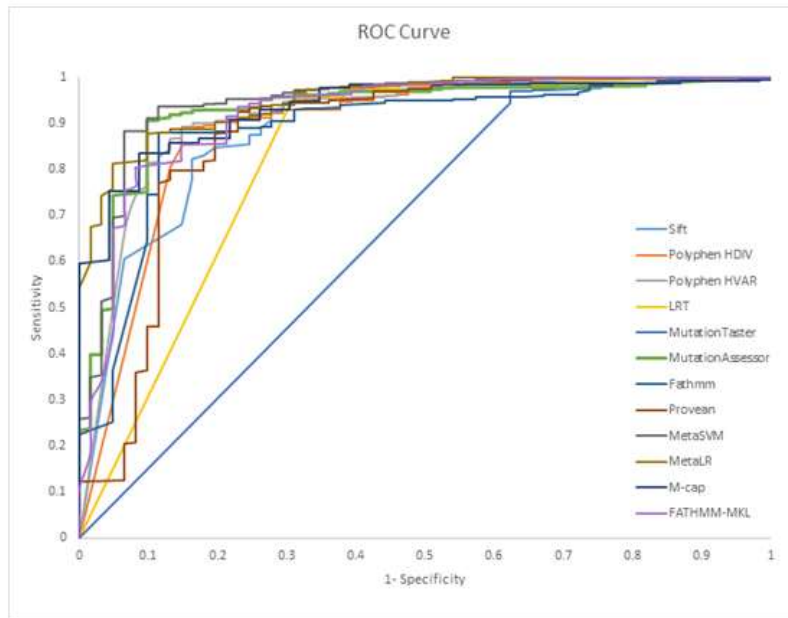

| Program          | Recommended cut-off | Our predicted cut-off for pathogenicity |
|------------------|---------------------|-----------------------------------------|
| SIFT             | <0.05               | <0.004                                  |
| Polyphen-HDIV    | >0.956              | >0.99                                   |
| Polyphen-HVAR    | >0.909              | >0.953                                  |
| LRT              | *                   | <0.001                                  |
| MutationTaster   | >0.5                | >0.999                                  |
| MutationAssessor | >3.5                | >3.115                                  |
| FATHMM           | <-1.5               | <-4.10                                  |
| Provean          | <-2.5               | <-5.23                                  |
| MetaSVM          | >0.82268            | >0.904                                  |
| MetaLR           | >0.5                | >0.907                                  |
| M-Cap            | >0.025              | >0.858                                  |
| FATHMM-MKL       | >0                  | >0.964                                  |

**Supplementary Figure 2.** Receiver operator curves for the 12 *in silico* programs using scores generated from type IV collagen variants obtained from disease databases. We find that the optimal cut-offs to maximize sensitivity while minimizing false positives (1-specificity) does not correlate with *in silico* program recommendations. \* score is not only consideration in categorization of pathogenicity.

## References

1. Ng, PC, Henikoff, S: SIFT: Predicting amino acid changes that affect protein function. *Nucleic Acids Research*, 31: 3812-3814, 2003.
2. Adzhubei, IA, Schmidt, S, Peshkin, L, Ramensky, VE, Gerasimova, A, Bork, P, Kondrashov, AS, Sunyaev, SR: A method and server for predicting damaging missense mutations. *Nature Methods*. NIH Public Access, 2010 pp 248-249.
3. Ramensky, V: Human non-synonymous SNPs: server and survey. *Nucleic Acids Research*, 30: 3894-3900, 2002.
4. Shihab, HA, Gough, J, Cooper, DN, Stenson, PD, Barker, GLA, Edwards, KJ, Day, INM, Gaunt, TR: Predicting the Functional, Molecular, and Phenotypic Consequences of Amino Acid Substitutions using Hidden Markov Models. *Human Mutation*, 34: 57-65, 2013.
5. Shihab, HA, Rogers, MF, Gough, J, Mort, M, Cooper, DN, Day, INM, Gaunt, TR, Campbell, C: An integrative approach to predicting the functional effects of non-coding and coding sequence variation. *Bioinformatics*, 31: 1536-1543, 2015.
6. Reva, B, Antipin, Y, Sander, C: Predicting the functional impact of protein mutations: Application to cancer genomics. *Nucleic Acids Research*, 39: e118-e118, 2011.
7. Reva, B, Antipin, Y, Sander, C: Determinants of protein function revealed by combinatorial entropy optimization. *Genome Biology*, 8: R232, 2007.
8. Schwarz, JM, Cooper, DN, Schuelke, M, Seelow, D: Mutationtaster2: Mutation prediction for the deep-sequencing age. *Nature Methods*. 2014 pp 361-362.
9. Choi, Y, Chan, AP: PROVEAN web server: A tool to predict the functional effect of amino acid substitutions and indels. *Bioinformatics*, 31: 2745-2747, 2015.
10. Choi, Y, Sims, GE, Murphy, S, Miller, JR, Chan, AP: Predicting the Functional Effect of Amino Acid Substitutions and Indels. *PLoS ONE*, 7: e46688, 2012.
11. Chun, S, Fay, JC: Identification of deleterious mutations within three human genomes. *Genome Research*, 19: 1553-1561, 2009.
12. Jagadeesh, KA, Wenger, AM, Berger, MJ, Guturu, H, Stenson, PD, Cooper, DN, Bernstein, JA, Bejerano, G: M-CAP eliminates a majority of variants of uncertain significance in clinical exomes at high sensitivity. *Nature Genetics*, 48: 1581-1586, 2016.
13. Dong, C, Wei, P, Jian, X, Gibbs, R, Boerwinkle, E, Wang, K, Liu, X: Comparison and integration of deleteriousness prediction methods for nonsynonymous SNVs in whole exome sequencing studies. *Human Molecular Genetics*, 24: 2125-2137, 2015.
14. Kim, S, Jhong, JH, Lee, J, Koo, JY: Meta-analytic support vector machine for integrating multiple omics data. *BioData Mining*, 10: 2, 2017.
